# Supplementary material for: Detecting the QTL-Allele System of Seed Oil Traits Using Multi-Locus Genome-Wide Association Analysis for Population Characterization and Optimal Cross Prediction in Soybean
Source: Front Plant Sci. 2018 Dec 5;9:1793. doi: 10.3389/fpls.2018.01793 (PMC6290252; doi:10.3389/fpls.2018.01793)
Supplement: Supplementary Table 7 — QTL-allele constitution of twenty accessions with the lowest and highest oleic acid content (%) for the detected oleic acid QTLs in CSLRP. [file Table_7.XLSX]

## Sheet: Sheet1
Supplementary Table 7. QTL-allele constitution of twenty accessions with the lowest and highest oleic acid content (%) for the detected oleic acid QTLs in CSLRP
QTL	R2	Lowest oleic acid											Highest oleic acid
		N21056	N23583	N24296	N10384	N24049	N02713.1	N05050	N05052.11	N24309	N24608		N04566	N24278	N23630	N01036	N23561	N00134	N01434	N21029	N23679	N23538
Oleic-a-01-1	3.1	0.1	-0.8	-1.6	-1.6	-1.6	-1.6	-1.6	-1.6	-0.8	-1.6		2.3	-1.6	2.3	-0.8	-1.6	-0.8	-0.8	0.1	-0.8	-1.6
Oleic-a-01-2	0.2	0	0	-0.6	-0.6	0	-0.6	0	-0.6	-0.6	0		-0.6	-0.6	0	0	0	0	0	0	-0.6	-0.6
Oleic-a-02-1	6.2	-0.6	-0.6	-0.6	-0.6	-0.6	-0.6	-0.6	-0.6	-0.6	-0.6		0.6	-0.6	-0.6	-0.6	0.6	0.6	-0.6	-0.6	-0.6	-0.6
Oleic-a-03-1	0.8	0.5	-0.1	-0.1	-0.1	0.1	-0.4	0.1	0.5	-0.4	0.5		-0.1	-0.1	-0.1	-0.1	-0.1	0.5	0.5	0.1	-0.1	-0.1
Oleic-a-03-2	0.6	-0.4	-0.6	1.3	-0.6	1.3	-0.6	-0.6	-1	-0.6	-1.2		-0.6	-1	-0.4	-0.6	-1	0.9	0.9	1	-1	-1
Oleic-a-03-3	0.5	0.3	1	0.3	1	0.3	-1.2	-0.2	1	-1.2	0.3		0.3	0.3	0.3	1	0.3	0.3	0.3	0.3	1	1
Oleic-a-03-4	1	-0.4	-0.4	1.1	1.1	-0.4	1.1	-0.7	-0.4	-0.7	1.1		0	1.1	-0.4	-0.7	-0.4	-0.4	-0.4	-0.4	-0.4	-0.4
Oleic-a-04-1	0.3	-0.5	-0.5	0.5	-0.5	-0.5	0.5	0.5	0.5	-0.5	-0.5		-0.5	0.5	-0.5	0.5	-0.5	-0.5	-0.5	0.5	-0.5	-0.5
Oleic-a-04-2	13.2	-1.5	0.5	0.5	0.5	0.5	-0.3	0.5	0.5	0.5	-0.3		0.5	0.8	0.8	0.8	0.5	0.8	0.8	0.8	2	2
Oleic-a-04-3	6.4	-0.3	-0.4	-0.4	-0.4	-0.4	-0.3	-0.4	-0.4	-0.4	2.3		-0.6	-0.3	-0.3	-0.3	-0.4	-0.7	-0.7	1	2.3	2.3
Oleic-a-04-4	0.5	-0.6	-0.6	-0.7	-0.6	-0.6	-0.6	0.3	-0.6	-0.6	-0.6		-0.6	-0.6	0.3	-0.6	-0.6	-0.6	-0.6	-0.6	-0.6	-0.6
Oleic-a-04-5	0.1	0.4	0.4	0.4	0.4	0.4	0.4	0.4	0.4	0.4	0.4		0.4	0.4	0.4	0.4	0.4	0.4	0.4	0.4	0.4	0.4
Oleic-a-05-1	0.2	0.2	-0.2	-0.2	-0.2	-0.2	0.2	-0.2	-0.2	-0.2	0.2		0.2	0.2	0.2	0.2	0.2	0.2	0.2	0.2	0.2	0.2
Oleic-a-05-2	0.1	-0.5	-0.5	-0.5	-0.5	-0.5	-0.5	-0.5	-0.5	-0.5	-0.5		-0.5	-0.5	-0.5	-0.5	0.5	-0.5	-0.5	-0.5	-0.5	-0.5
Oleic-a-05-3	0.4	-1.2	-1.2	-1.2	-1.2	-1.2	-1.2	-1.2	-1.2	-1.2	-1.2		-1.2	1.2	-1.2	-1.2	1.2	-1.2	-1.2	-1.2	-1.2	-1.2
Oleic-a-05-4	2.2	-0.9	-0.9	-0.9	-0.9	0.9	0.9	0.9	0.9	-0.9	0.9		0.9	0.9	0.9	-0.9	0.9	0.9	0.9	0.9	0.9	0.9
Oleic-a-05-5	1.3	0.7	0.7	0.7	0.7	0.7	0.7	0.7	0.7	0.7	0.7		0.7	0.7	0.7	0.7	0.7	0.7	0.7	0.7	0.7	0.7
Oleic-a-05-6	0.1	0.5	0.5	0.5	0.5	0.5	0.5	0.5	0.5	0.5	0.5		0.5	0.5	0.5	0.5	0.5	0.5	0.5	0.5	0.5	0.5
Oleic-a-05-7	1.5	0.5	-0.5	-0.5	-0.5	-0.5	-0.5	-0.5	-0.5	-0.5	-0.5		-0.5	-0.5	-0.5	-0.5	-0.5	-0.5	-0.5	-0.5	-0.5	-0.5
Oleic-a-06-1	0	0.4	0.4	-0.4	0.4	0.4	0.4	0.4	0.4	0.4	0.4		0.4	0.4	0.4	0.4	0.4	0.4	-0.4	0.4	-0.4	-0.4
Oleic-a-06-2	0.1	0.7	0.7	0.7	0.7	0.7	0.7	0.7	0.7	0.7	0.7		0.7	0.7	0.7	-0.7	0.7	-0.7	0.7	0.7	0.7	0.7
Oleic-a-06-3	1.1	-1.2	-1.2	-1.2	-1.2	-1.2	-1.2	-1.2	-1.2	-1.2	-1.2		-1.2	-1.2	-1.2	1.2	-1.2	1.2	-1.2	-1.2	-1.2	-1.2
Oleic-a-06-4	2.3	1.2	1.2	1.2	1.2	1.2	1.2	1.2	1.2	1.2	1.2		1.2	1.2	1.2	1.2	1.2	1.2	1.2	1.2	1.2	1.2
Oleic-a-06-5	0.1	-0.6	-0.6	-0.6	-0.6	-0.6	-0.6	-0.6	-0.6	-0.6	-0.6		-0.6	-0.6	-0.6	-0.6	-0.6	-0.6	-0.6	-0.6	-0.6	-0.6
Oleic-a-06-6	0.4	0.7	0.7	0.7	0.7	0.7	0.7	0.7	0.7	0.7	0.7		0.7	0.7	0.7	0.7	0.7	0.7	0.7	0.7	0.7	0.7
Oleic-a-07-1	1.8	0.4	-0.4	-0.4	-0.4	-0.4	-0.4	-0.4	-0.4	-0.4	0.4		-0.4	-0.4	-0.4	-0.4	-0.4	0.4	0.4	-0.4	-0.4	-0.4
Oleic-a-07-2	0.2	0.4	0.4	0.4	0.4	0.4	0.4	0.4	0.4	0.4	0.4		0.4	0.4	0.4	0.4	0.4	0.4	0.4	0.4	0.4	0.4
Oleic-a-07-3	0	-0.2	-0.2	-0.2	-0.2	-0.2	-0.2	-0.2	-0.2	-0.2	-0.2		-0.2	0.2	-0.2	-0.2	-0.2	-0.2	-0.2	-0.2	-0.2	0.2
Oleic-a-07-4	0.5	-0.3	-0.3	-0.3	-0.3	-0.3	0.2	-0.3	-0.3	-0.3	-0.3		0.2	0.2	-0.3	0.1	0.9	0.2	0.2	0.2	0.2	0.2
Oleic-a-08-1	0.3	-1.3	-1.3	-1.3	-1.3	-1.3	-1.3	-1.3	-1.3	-1.3	-1.3		-1.3	-1.3	-1.3	-1.3	1.3	1.3	1.3	-1.3	-1.3	-1.3
Oleic-a-08-2	0	0.5	0.5	0.5	0.5	0.5	-0.5	0.5	0.5	0.5	0.5		0.5	0.5	0.5	0.5	0.5	0.5	0.5	0.5	0.5	0.5
Oleic-a-08-3	1.4	-0.3	0.3	0.3	0.3	0.3	-0.3	-0.3	-0.3	0.3	-0.3		0.3	0.3	0.3	0.3	0.3	0.3	0.3	0.3	0.3	0.3
Oleic-a-09-1	0.2	-1.2	-1.2	-1.2	-1.2	-1.2	-1.2	-1.2	-1.2	-1.2	-1.2		-1.2	-1.2	-1.2	-1.2	-1.2	-1.2	-1.2	-1.2	-1.2	-1.2
Oleic-a-09-2	1.2	0	0	0	1.6	0	1.6	0	1.6	-0.3	-0.3		0	0.1	0.1	0.1	0.1	0	0	0.1	1.6	1.6
Oleic-a-09-3	1.6	-1.8	-1.6	-1.6	-1.8	-1.6	-1.6	-1.8	-1.8	-1.8	-1.6		-1.6	3.5	3.5	-1.6	3.5	-1.6	-1.6	-1.6	-1.6	-1.6
Oleic-a-09-4	0.9	2.5	1.3	1.3	2.5	1.3	1.3	2.5	2.5	2.5	1.3		1.3	-3	-3	1.3	-3	1.3	1.3	1.3	1.3	1.3
Oleic-a-09-5	0.2	0.3	0.3	-0.6	-0.6	0.3	-0.6	-0.6	0.3	0.3	0.9		0.3	0.9	0.3	0.3	0.9	0.9	0.9	0.3	0.3	0.3
Oleic-a-09-6	0.1	-0.1	0.1	0.1	-0.1	-0.1	-0.1	-0.1	-0.1	-0.1	0.1		0.1	0.1	-0.1	-0.1	-0.1	0.1	0.1	0.1	-0.1	-0.1
Oleic-a-09-7	0.2	-0.2	-0.2	-0.2	-0.2	-0.2	-0.2	-0.2	-0.2	0.2	-0.2		-0.2	0.2	-0.2	-0.2	-0.2	-0.2	-0.2	-0.2	-0.2	-0.2
Oleic-a-09-8	0	0.5	0.5	0.5	0.5	0.5	0.5	0.5	0.5	0.5	0.5		0.5	0.5	0.5	0.5	-0.5	0.5	0.5	0.5	0.5	0.5
Oleic-a-09-9	0.1	0.3	0.3	-0.1	0.3	-0.1	0.3	-0.1	-0.1	0.3	0.3		0.3	-0.1	0.3	-0.1	0.3	0.3	0.3	-0.1	-0.1	-0.1
Oleic-a-09-10	0.1	-0.9	-0.9	-0.9	-0.9	-0.9	-0.9	-0.9	-0.9	-0.9	-0.9		-0.9	-0.9	-0.9	0.9	-0.9	-0.9	-0.9	-0.9	-0.9	-0.9
Oleic-a-10-1	0.3	0.7	0.7	0.7	0.7	0.7	0.7	0.7	0.7	0.7	0.7		0.7	0.7	-0.7	0.7	0.7	-0.7	0.7	0.7	-0.7	-0.7
Oleic-a-10-2	0.2	-1	-1	-1	-1	-1	-1	-1	-1	-1	-1		-1	-1	-1	-1	-1	-1	-1	1	-1	-1
Oleic-a-10-3	0.5	-0.7	0.7	0.7	-0.7	-0.7	-0.7	-0.7	-0.7	-0.7	-0.7		-0.7	-0.7	-0.7	-0.7	-0.7	-0.7	-0.7	-0.7	-0.7	-0.7
Oleic-a-10-4	0.1	0.8	-0.8	0.8	0.8	0.8	0.8	0.8	0.8	0.8	0.8		0.8	-0.8	-0.8	0.8	0.8	-0.8	-0.8	0.8	0.8	0.8
Oleic-a-11-1	0.4	-0.6	-0.5	-0.5	-0.5	-0.5	-0.7	-0.6	-0.5	1.6	-0.5		-0.7	-0.5	-0.5	-0.5	0.2	-0.5	-0.5	-0.5	0.2	0.2
Oleic-a-11-2	0	-0.5	-0.5	-0.5	-0.5	-0.5	-0.5	-0.5	-0.5	-0.5	-0.5		-0.5	0.5	-0.5	-0.5	-0.5	-0.5	-0.5	-0.5	-0.5	-0.5
Oleic-a-11-3	0.4	-1	-1	-1	-1	-1	-1	-1	-1	-1	-1		-1	-1	-1	-1	-1	-1	-1	-1	-1	-1
Oleic-a-11-4	0.5	-0.2	-0.2	-0.2	-0.2	-0.2	0	-0.2	-0.2	-0.2	-0.2		0.2	-0.2	-0.2	0	0.2	0.8	0.2	0.2	-0.2	-0.2
Oleic-a-11-5	0.5	-1.5	-1.5	-1.5	-1.5	-1.5	-1.5	-1.5	-1.5	-1.5	-1.5		-1.5	-1.5	-1.5	-1.5	-1.5	1.5	1.5	-1.5	-1.5	-1.5
Oleic-a-12-1	0.1	-0.5	-0.5	0.5	-0.5	-0.5	-0.5	0.5	-0.5	-0.5	-0.5		-0.5	-0.5	-0.5	-0.5	0.5	-0.5	-0.5	-0.5	-0.5	-0.5
Oleic-a-12-2	0	-0.3	-0.3	-0.3	-0.3	-0.3	-0.3	-0.3	-0.3	-0.3	-0.3		-0.3	-0.3	-0.3	-0.3	-0.3	-0.3	-0.3	-0.3	-0.3	-0.3
Oleic-a-12-3	0.1	0.7	0.7	0.7	0.7	0.7	0.7	0.7	0.7	0.7	0.7		0.7	0.7	0.7	0.7	0.7	-0.7	-0.7	0.7	0.7	0.7
Oleic-a-12-4	0.1	-0.2	1.4	-0.2	-0.2	0	-0.2	-0.2	1.4	-0.2	-0.2		-0.2	-0.2	-0.2	0	-0.2	-0.2	-0.2	-0.2	0	0
Oleic-a-12-5	0.1	-0.7	-0.7	0.7	-0.7	-0.7	-0.7	-0.7	-0.7	-0.7	-0.7		-0.7	-0.7	-0.7	-0.7	-0.7	-0.7	-0.7	-0.7	-0.7	-0.7
Oleic-a-12-6	0.1	0.4	0.4	-0.4	0.4	0.4	0.4	0.4	0.4	0.4	0.4		0.4	0.4	0.4	0.4	0.4	0.4	0.4	0.4	0.4	0.4
Oleic-a-12-7	0.1	-0.3	-0.5	-0.5	-0.3	-0.3	-0.3	-0.3	-0.3	-0.3	-0.3		-0.3	-0.3	-0.5	-0.3	-0.3	-0.3	-0.3	-0.3	0.8	0.8
Oleic-a-13-1	0.7	-1.1	1.1	1.1	1.1	1.1	1.1	1.1	1.1	1.1	1.1		1.1	1.1	1.1	1.1	1.1	1.1	1.1	1.1	1.1	1.1
Oleic-a-13-2	4.1	-1.8	-1.8	-1.8	-1.8	-1.8	-1.8	-1.8	-1.8	-1.8	-1.8		-1.8	-1.8	-1.8	1.8	-1.8	-1.8	1.8	-1.8	-1.8	-1.8
Oleic-a-13-3	0	0.4	0.4	0.4	0.4	0.4	0.4	0.4	0.4	0.4	0.4		0.4	-0.4	0.4	0.4	-0.4	0.4	0.4	0.4	-0.4	-0.4
Oleic-a-13-4	0.4	-0.3	-0.2	0.6	-0.3	0.6	-0.3	-0.1	0.6	-0.3	-0.1		-0.3	0.6	-0.3	-0.2	0.6	-0.1	-0.1	0.6	0.6	0.6
Oleic-a-13-5	0	-0.2	0.2	0.2	0.2	0.2	0.2	0.2	0.2	0.2	-0.2		-0.2	0.2	0.2	-0.2	0.2	0.2	0.2	-0.2	0.2	-0.2
Oleic-a-14-1	2.4	-1.1	-1.1	-1.1	0.3	0.3	1.2	-1.1	-1.1	0.3	-1.1		-1.1	-1.1	-1.1	1.2	1.2	-1.1	-1.1	0.3	0.3	0.3
Oleic-a-14-2	0.1	0.4	0.4	0.4	0.4	0.4	-0.4	0.4	0.4	0.4	0.4		0.4	0.4	0.4	-0.4	0.4	0.4	0.4	-0.4	-0.4	-0.4
Oleic-a-15-1	1.4	-1.2	-1.2	-1.2	-1.2	-1.2	-1.2	-1.2	-1.2	-1.2	-1.2		-1.2	-1.2	-1.2	-1.2	-1.2	-1.2	-1.2	1.2	-1.2	1.2
Oleic-a-15-2	0.2	0.1	0.1	0.1	0.1	0.1	-0.2	-0.2	0.1	0.1	0.1		0.1	0.1	0.1	0.1	0.1	-0.2	-0.2	-0.2	0.1	0.1
Oleic-a-15-3	6.2	0.7	-1	-0.2	0.7	-0.2	-1	-0.2	-0.2	-1	0.7		-1	0.1	-0.2	-0.2	-0.2	-1	-0.2	-0.2	-0.2	-0.2
Oleic-a-15-4	0.2	0.4	-0.7	0	0.4	0	0.3	0	0	0.4	0.3		0	0	0	0	0	0	0	0	0	0.3
Oleic-a-16-1	1.5	-0.6	0.6	-0.6	0.6	0.6	0.6	0.6	0.6	0.6	0.6		0.6	0.6	-0.6	-0.6	0.6	0.6	0.6	0.6	0.6	0.6
Oleic-a-16-2	0.4	0.4	0.4	-0.3	-0.3	-0.2	-0.2	-0.2	0.5	-0.2	-0.2		0.4	-0.3	0.4	0.4	-0.3	0.4	0.4	-0.6	-0.3	-0.3
Oleic-a-16-3	1.1	-0.4	0.4	0.4	0.4	-0.4	-0.4	-0.4	0.4	-0.4	-0.4		0.4	0.4	-0.4	-0.4	0.4	-0.4	-0.4	-0.4	0.4	0.4
Oleic-a-16-4	0.5	-0.8	-0.8	-0.8	-0.8	-0.8	-0.8	-0.8	-0.8	-0.8	-0.8		-0.8	-0.8	0.8	-0.8	-0.8	-0.8	-0.8	-0.8	-0.8	-0.8
Oleic-a-16-5	0.9	-1	-1	-1	-1	-1	-1	-1	-1	-1	-1		-1	-1	1	-1	-1	-1	-1	-1	-1	-1
Oleic-a-16-6	0.1	0.3	0.1	0.1	0.1	0.1	0.1	0.3	0.1	0.1	0.2		0.3	0.1	0.3	0.1	0.1	0.2	0.2	0.2	0.1	0.1
Oleic-a-16-7	0.2	1	1	1	1	1	1	1	1	1	1		1	1	1	1	1	1	1	1	1	1
Oleic-a-17-1	5.3	-4.9	-4.9	-4.9	-4.9	-4.9	-4.9	-4.9	-4.9	-4.9	-4.9		-4.9	-4.9	-4.9	-4.9	-4.9	-4.9	-4.9	-4.9	4.9	4.9
Oleic-a-17-2	0.2	0.7	0.7	0.7	0.7	-0.7	0.7	0.7	0.7	0.7	0.7		0.7	0.7	0.7	0.7	0.7	0.7	0.7	0.7	0.7	0.7
Oleic-a-17-3	1	0.2	-0.2	-0.2	-0.2	-0.2	-0.2	-0.2	-0.2	-0.2	-0.2		0.2	0.2	0.2	-0.2	-0.2	0.2	0.2	0.2	0.2	0.2
Oleic-a-17-4	0.2	1.4	1.4	1.4	1.4	1.4	1.4	1.4	1.4	1.4	1.4		1.4	1.4	1.4	1.4	1.4	1.4	1.4	1.4	1.4	1.4
Oleic-a-17-5	0.2	0	-0.2	-0.9	0	0	-0.1	0	0	1.2	-0.9		0	-0.1	1.2	0	-0.9	1.2	1.2	0	0	0
Oleic-a-17-6	0.3	-0.9	-0.9	-0.9	-0.9	-0.9	-0.9	-0.9	-0.9	-0.9	-0.9		-0.9	-0.9	-0.9	-0.9	-0.9	0.9	-0.9	-0.9	-0.9	-0.9
Oleic-a-17-7	0.3	-0.3	0.3	0.3	-0.3	-0.3	0.3	0.3	-0.3	-0.3	0.3		0.3	0.3	-0.3	0.3	-0.3	0.3	0.3	0.3	0.3	0.3
Oleic-a-18-1	0.3	0	-0.1	0	0	0	-0.7	-0.1	0	0	-0.1		-0.1	-0.1	-0.1	-0.1	-0.1	-0.1	-0.1	-0.1	-0.1	-0.1
Oleic-a-18-2	0.2	0.2	0.2	-1.3	0.2	0.2	0.2	0.2	-1.3	0.2	0.2		0.2	0.2	0.2	0.2	-1.3	0.2	0.2	0.2	0.2	0.2
Oleic-a-18-3	0.5	-0.3	-0.3	-0.3	-0.3	-0.3	-0.3	-0.3	-0.3	-0.3	-0.3		0.3	-0.3	-0.3	-0.3	-0.3	-0.3	-0.3	-0.3	-0.3	-0.3
Oleic-a-18-4	0.4	-0.9	-0.9	-0.9	-0.9	-0.2	-0.9	-0.2	-0.2	-0.9	-0.9		-0.9	-0.9	-0.9	-0.9	-0.2	-0.9	-0.9	-0.9	-0.9	0.4
Oleic-a-18-5	0.2	0.3	-0.3	-0.3	-0.3	-0.3	-0.3	-0.3	-0.3	0.3	0.3		0.3	0.3	0.3	-0.3	-0.3	0.3	0.3	0.3	0.3	0.3
Oleic-a-18-6	0	0.4	-0.3	-0.3	-0.3	-0.3	-0.3	-0.3	-0.3	-0.1	-0.3		-0.1	-0.3	-0.3	-0.1	-0.3	-0.3	-0.3	-0.1	-0.1	-0.1
Oleic-a-18-7	0	-0.3	-0.3	-0.3	0.3	-0.3	-0.3	-0.3	-0.3	-0.3	-0.3		-0.3	-0.3	-0.3	-0.3	-0.3	-0.3	-0.3	-0.3	-0.3	-0.3
Oleic-a-18-8	0.2	-0.2	-0.2	-0.2	-0.2	-0.2	0.2	-0.2	-0.2	-0.2	-0.2		0.2	-0.2	0.2	-0.2	-0.2	-0.2	-0.2	0.2	-0.2	-0.2
Oleic-a-18-9	4.6	-1.2	-1.1	2.2	-1.2	-1.2	-1.2	-1.1	-1.1	-1.2	-1.1		-1.2	2.2	-1.2	-1.1	2.2	-1.2	-1.2	-1.2	-1.2	-1.2
Oleic-a-19-1	0.1	-1	1	-1	1	1	1	1	1	1	1		1	1	1	1	1	1	1	1	1	1
Oleic-a-20-1	0.1	-0.8	-0.8	-0.8	-0.8	-0.8	-0.8	-0.8	-0.8	-0.8	-0.8		0.8	-0.8	0.8	-0.8	-0.8	-0.8	-0.8	-0.8	-0.8	-0.8
Oleic-a-20-2	0.7	1.2	1.2	-1.2	-1.2	-1.2	1.2	1.2	-1.2	1.2	1.2		1.2	1.2	1.2	1.2	1.2	1.2	1.2	1.2	1.2	1.2
Oleic-a-20-3	0	-1	-1	1	1	-1	-1	-1	1	-1	-1		-1	-1	-1	-1	-1	-1	-1	-1	-1	-1
Oleic-a-20-4	0.1	-0.3	-0.3	-0.3	-0.3	-0.3	-0.3	-0.3	-0.3	-0.3	-0.3		-0.3	-0.3	-0.3	0.3	-0.3	-0.3	-0.3	-0.3	-0.3	-0.3
Oleic-a-20-5	0.4	0.8	0.8	0.8	0.8	0.8	0.8	0.8	0.8	0.8	-0.8		0.8	0.8	0.8	0.8	0.8	0.8	0.8	0.8	0.8	0.8
Oleic acid content		11.9	12.3	12.4	13.3	13.3	13.4	13.8	14.1	14.2	14.2		29.8	29.9	30	30.9	31.1	31.1	31.2	34.5	35.1	37.1
Positive allele number		40	40	39	40	38	38	36	39	39	41		50	49	44	42	47	48	47	49	44	46
Negative allele number		58	58	59	58	60	60	62	59	59	57		48	49	54	56	51	50	51	49	54	52
The allele with positive effect on each locus is highlighted in red while with negative effect in blue with darkness indicating the size of the positive or negative effect.
