# Supplementary material for: Detecting the QTL-Allele System of Seed Oil Traits Using Multi-Locus Genome-Wide Association Analysis for Population Characterization and Optimal Cross Prediction in Soybean
Source: Front Plant Sci. 2018 Dec 5;9:1793. doi: 10.3389/fpls.2018.01793 (PMC6290252; doi:10.3389/fpls.2018.01793)
Supplement: Supplementary Table 8 — QTL-allele constitution of twenty accessions with the lowest and highest linolenic acid content (%) for the detected linolenic acid QTLs in CSLRP. [file Table_8.XLSX]

## Sheet: Sheet1
Supplementary Table 8. QTL-allele constitution of twenty accessions with the lowest and highest linolenic acid content (%) for the detected linolenic acid QTLs in CSLRP
QTL	R2	Lowest linolenic acid											Highest linolenic acid
		N23679	N23538	N21029	N24278	N23561	N01434	N23630	N00134	N24613	N24599		N03073	N08665	N03172	N10384	N02806	N24617	N24619	N24438	N24608	N21056
Linolenic-a-01-1	0.4	-0.1	-0.1	-0.1	-0.1	-0.1	-0.1	-0.1	-0.1	-0.1	-0.1		-0.1	-0.1	-0.1	0.3	-0.1	-0.1	-0.1	-0.1	-0.1	-0.1
Linolenic-a-01-2	0.7	-0.2	-0.2	-0.2	0.2	-0.1	-0.2	0	-0.2	-0.2	-0.2		0	-0.2	-0.1	0	0	0	0	-0.2	-0.2	0
Linolenic-a-01-3	0.3	0.2	0.2	0.2	0.2	0.2	0.2	0.2	0.2	0.2	0.2		0.2	0.2	0.2	0.2	0.2	0.2	0.2	0.2	-0.2	0.2
Linolenic-a-02-1	0.3	-0.2	-0.2	-0.2	-0.2	-0.2	-0.2	-0.2	-0.2	-0.2	-0.2		-0.2	-0.2	-0.2	0	-0.2	0	-0.2	-0.2	-0.2	-0.2
Linolenic-a-02-2	1.5	-0.2	-0.2	-0.2	-0.2	-0.2	-0.2	-0.2	-0.2	-0.2	-0.2		0.2	0.2	-0.2	-0.2	-0.2	0.2	0.2	-0.2	0.2	-0.2
Linolenic-a-03-1	0.7	0.1	0.1	0.1	0.1	0.1	0.2	0.2	0.2	0.1	0.1		0.2	0.1	-0.3	0.1	-0.3	0.1	-0.3	0.1	-0.3	0.2
Linolenic-a-03-2	0.9	-0.1	-0.1	0.2	-0.1	-0.1	-0.5	-0.5	-0.5	0.2	0.2		-0.5	0.2	0.2	-0.1	0.2	-0.1	0.2	-0.1	0.2	0.2
Linolenic-a-03-3	9.4	-0.7	-0.7	0.1	-0.7	-0.7	0.1	0.4	0.1	0	0.1		0.1	0.1	0.1	0.1	0.1	0.1	0.1	0.1	0.2	0.1
Linolenic-a-04-1	1	0.4	0.4	0.4	0.4	0.4	0.4	0.4	0.4	0.4	0.4		0.4	0.4	0.4	0.4	0.4	0.4	0.4	0.4	0.4	0.4
Linolenic-a-04-2	16.8	-1.1	-1.1	0	0	0.1	0	0	0	0	-1.1		0.1	0	0	0.1	0.1	0	0.1	0.3	0.3	0.4
Linolenic-a-04-3	2.4	-0.4	-0.4	0.4	0.4	0.4	0.4	0.4	0.4	0.4	0.4		0.4	0.4	0.4	0.4	0.4	0.4	0.4	0.4	0.4	0.4
Linolenic-a-04-4	1.9	-0.1	-0.1	-0.4	-0.3	-0.1	-0.4	-0.3	-0.4	-0.4	-0.1		-0.1	-0.5	-0.5	-0.1	-0.1	-0.5	-0.1	-0.3	0.3	-0.4
Linolenic-a-04-5	0.5	0	0	0.1	0.1	0	0	0.1	0	0.1	0		0.1	0.1	0.1	0	0.1	0.1	0	0.1	0.4	0.4
Linolenic-a-04-6	2	0.1	-0.1	0.1	0.1	0.1	0.1	0.1	-0.1	0.1	0.1		0.1	0.1	0.1	0.1	0.1	0.1	0.1	0.1	0.1	0.1
Linolenic-a-05-1	0.5	-0.3	-0.3	-0.3	-0.3	-0.3	-0.3	-0.3	-0.3	-0.3	-0.3		-0.3	-0.3	-0.3	-0.3	-0.3	-0.3	-0.3	0.3	-0.3	-0.3
Linolenic-a-06-1	0.5	0.1	0.1	0.1	-0.1	0.1	-0.1	-0.1	-0.1	0.1	0.1		0.1	0.1	-0.1	0.1	-0.1	0.1	-0.1	0.1	0.1	-0.1
Linolenic-a-06-2	1.3	-0.6	-0.6	-0.6	-0.6	-0.6	-0.6	-0.6	-0.6	-0.6	-0.6		-0.6	-0.6	-0.6	-0.6	-0.6	-0.6	-0.6	-0.6	-0.6	-0.6
Linolenic-a-06-3	0.3	-0.4	-0.4	-0.4	-0.4	-0.4	-0.4	-0.4	-0.4	-0.4	-0.4		-0.4	-0.4	-0.4	-0.4	0.4	-0.4	-0.4	-0.4	0.4	-0.4
Linolenic-a-07-1	1.2	-0.1	-0.1	-0.1	-0.1	-0.1	0.2	-0.1	-0.1	-0.1	-0.1		0.2	-0.1	-0.1	0.2	-0.1	-0.1	-0.1	-0.1	-0.1	-0.1
Linolenic-a-09-1	0.8	0	0	0	0	0	0.2	0	0.2	0	0		-0.1	0	0	-0.1	0	0	0	0.2	0	-0.1
Linolenic-a-09-2	1.4	-0.1	-0.1	-0.1	-0.1	-0.1	-0.1	-0.1	-0.1	-0.1	-0.1		-0.1	-0.1	-0.1	-0.1	-0.1	-0.1	-0.1	-0.1	-0.1	-0.1
Linolenic-a-09-3	6.4	0.1	0.1	-0.1	-0.1	-0.1	-0.1	0.1	-0.1	-0.1	0.1		-0.1	-0.1	0.1	-0.1	0.1	0.1	0.1	0.7	-0.1	0.1
Linolenic-a-09-4	0.4	0.2	0.2	0.2	-0.2	-0.2	0.2	0.2	0.2	0.2	0.2		0.2	0.2	0.2	0.2	0.2	0.2	0.2	0.2	0.2	0.2
Linolenic-a-10-1	0.8	-0.3	-0.3	-0.3	-0.3	-0.3	-0.3	-0.3	-0.3	-0.3	-0.3		-0.3	0.3	-0.3	-0.3	-0.3	-0.3	-0.3	-0.3	-0.3	-0.3
Linolenic-a-10-2	1.7	-0.1	-0.1	0	0	-0.1	-0.1	-0.1	-0.1	0	0		-0.1	0	-0.1	-0.1	-0.1	0.4	-0.1	-0.1	-0.1	-0.1
Linolenic-a-10-3	0.2	0.1	-0.1	-0.1	0.1	0.1	0.1	0.1	0.1	0.1	0.1		0.1	0.1	0.1	0.1	0.1	0.1	0.1	0.1	0.1	0.1
Linolenic-a-10-4	1.7	0.3	0.3	0.3	-0.3	0.3	0.3	0.3	0.3	0.3	0.3		0.3	0.3	0.3	0.3	0.3	0.3	0.3	0.3	0.3	0.3
Linolenic-a-10-5	0.5	0.2	0.2	-0.2	0.2	0.2	0.2	0.2	0.2	0.2	0.2		0.2	0.2	0.2	0.2	0.2	0.2	0.2	0.2	0.2	0.2
Linolenic-a-11-1	1.2	-0.2	-0.2	-0.2	-0.2	-0.2	-0.2	-0.2	-0.2	-0.2	-0.2		-0.2	0.2	-0.2	-0.2	-0.2	0.2	-0.2	-0.2	-0.2	-0.2
Linolenic-a-11-2	0.3	0.2	0.2	0.2	0.2	0.2	-0.2	0.2	0.2	0.2	0.2		0.2	0.2	0.2	0.2	0.2	0.2	0.2	0.2	0.2	0.2
Linolenic-a-12-1	0.9	-0.3	-0.3	-0.3	-0.3	-0.3	-0.3	-0.3	-0.3	-0.3	-0.3		-0.3	-0.3	-0.3	-0.3	-0.3	-0.3	-0.3	-0.3	-0.3	-0.3
Linolenic-a-12-2	0.8	0.1	0.1	0.1	0.1	0.1	0.1	0.1	0.1	0.1	0.1		0.1	0.1	0.1	0.1	0.1	0.1	0.1	0.1	-0.3	0.1
Linolenic-a-12-3	3.3	0.3	0.3	0.3	0.3	0.3	-0.3	0.3	-0.3	0.3	0.3		0.3	0.3	0.3	0.3	0.3	0.3	0.3	0.3	0.3	0.3
Linolenic-a-13-1	0.7	0.1	0.1	-0.1	0.1	-0.1	-0.1	0.1	-0.1	-0.1	0.1		-0.1	-0.1	-0.1	-0.1	0	-0.1	0.1	0.1	-0.1	0.1
Linolenic-a-13-2	0.8	0.4	0.4	0.4	0.4	0.4	0.4	0.4	0.4	0.4	0.4		0.4	0.4	0.4	0.4	0.4	0.4	0.4	0.4	0.4	0.4
Linolenic-a-14-1	0.4	0.4	0.4	0.4	0.4	0.4	0.4	-0.4	0.4	0.4	0.4		0.4	0.4	0.4	0.4	0.4	0.4	0.4	0.4	0.4	0.4
Linolenic-a-14-2	1.7	0.5	0.5	0.5	0.5	0.5	0.5	0.5	0.5	0.5	0.5		0.5	0.5	0.5	0.5	0.5	0.5	0.5	0.5	0.5	0.5
Linolenic-a-15-1	2.3	-0.1	-0.1	-0.1	-0.1	-0.1	-0.1	-0.1	-0.1	-0.1	-0.1		0.1	0.1	0.1	-0.1	0.1	-0.1	-0.1	-0.1	0.1	0.1
Linolenic-a-15-2	0.4	0.2	0.2	0.2	-0.2	0.2	0.2	-0.2	0.2	0.2	0.2		0.2	0.2	0.2	0.2	-0.2	0.2	0.2	0.2	0.2	0.2
Linolenic-a-15-3	0.3	-0.3	-0.3	0.3	0.3	0.3	0.3	0.3	0.3	0.3	-0.3		0.3	0.3	0.3	0.3	0.3	0.3	0.3	0.3	-0.3	0.3
Linolenic-a-15-4	0.7	-0.2	-0.2	-0.2	-0.2	-0.2	-0.2	-0.2	-0.2	-0.2	-0.2		-0.2	-0.2	-0.2	-0.2	-0.2	-0.2	-0.2	0.2	-0.2	-0.2
Linolenic-a-16-1	0.5	-0.2	-0.2	0.2	-0.2	-0.2	0.2	0.2	0.2	0.2	0.2		0.2	0.2	0.2	-0.2	0.2	0.2	0.2	0.2	0.2	0.2
Linolenic-a-16-2	0.6	-0.1	-0.1	-0.1	-0.1	-0.1	-0.1	-0.1	-0.1	-0.1	-0.1		0.1	-0.1	-0.1	0.1	-0.1	-0.1	-0.1	-0.1	-0.1	0.1
Linolenic-a-17-1	0.5	0.1	-0.1	-0.1	0.1	0.1	0.1	0.1	0.1	0.1	0.1		0.1	0.1	0.1	0.1	0.1	0.1	0.1	0.1	0.1	0.1
Linolenic-a-17-2	0.6	-0.1	-0.1	-0.1	0	-0.1	-0.1	-0.1	-0.1	-0.1	-0.1		-0.1	0	0.1	0.1	-0.1	0.1	-0.1	0	0.1	-0.1
Linolenic-a-17-3	0.4	-0.2	-0.2	-0.2	-0.2	-0.2	-0.2	-0.2	-0.2	-0.2	-0.2		-0.2	0.2	-0.2	-0.2	-0.2	-0.2	-0.2	-0.2	-0.2	-0.2
Linolenic-a-18-1	6.2	-0.1	-0.1	-0.5	-0.1	-0.1	0	-0.1	0	-0.1	-0.1		-0.1	0.3	-0.1	0.2	0.2	-0.1	-0.1	0.2	0.3	0.3
Linolenic-a-18-2	1.3	-0.2	-0.2	-0.2	-0.2	-0.2	-0.2	-0.2	-0.2	-0.2	-0.2		0.2	0.2	-0.2	-0.2	-0.2	-0.2	0.2	-0.2	-0.2	0.2
Linolenic-a-18-3	0.5	0.1	0.1	-0.4	0.2	0.2	0.2	0.2	0.1	-0.4	0.2		0.2	0.2	0.2	0.2	0.2	0.2	0.2	0.2	0.2	0.2
Linolenic-a-18-4	2.8	0.1	0.1	0.1	-0.3	-0.3	0.1	0.1	0.1	0.1	0.3		0.1	0.1	0.1	0.1	0.1	0.1	0.1	0.1	0.3	0.1
Linolenic content		2.9	3.1	4.3	4.4	5	5.4	5.5	5.5	5.7	5.8		9.8	9.9	9.9	10.1	10.1	10.1	10.1	10.3	10.3	10.4
Positive allele no.		23	20	23	21	22	23	24	22	25	28		30	34	27	30	29	31	29	31	29	31
Negative allele no.		27	30	27	29	28	27	26	28	25	22		20	16	23	20	21	19	21	19	21	19
The allele with positive effect on each locus is highlighted in red while with negative effect in blue with darkness indicating the size of the positive or negative effect.
